# Supplementary material for: Increased Level of Vascular Endothelial Growth Factors by 4-hexylresorcinol is Mediated by Transforming Growth Factor-β1 and Accelerates Capillary Regeneration in the Burns in Diabetic Animals
Source: PubMed Central journal article supplement (PMC7279008; doi:10.3390/ijms21103473), 2020-05-14
Supplement: ijms-21-03473-s001.pdf [file ijms-21-03473-s001.pdf]

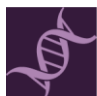

A

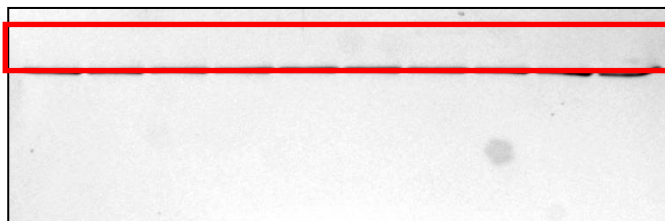

B

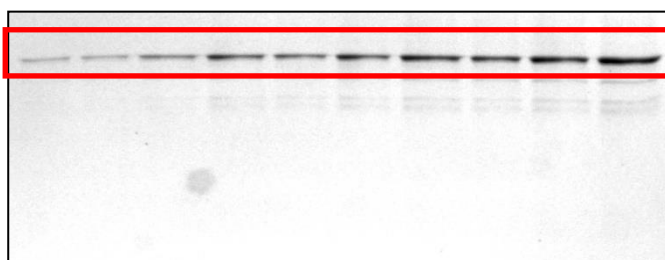

C

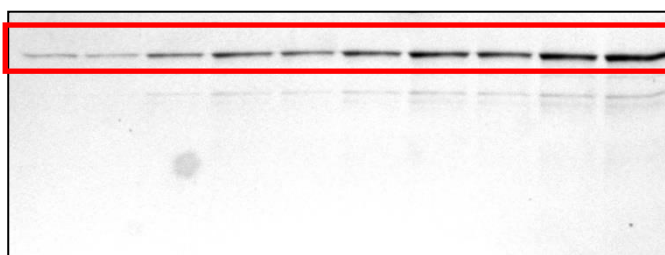

D

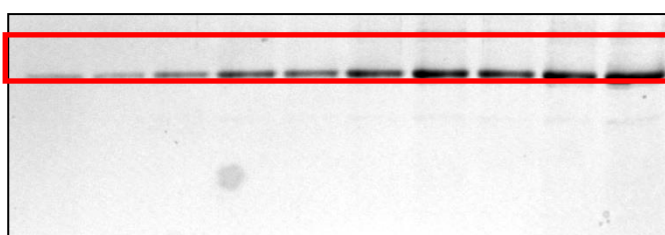

**Figure S1.** Full length blot of Figure 1A. The application of 4HR increased the expression of VEGF-A, VEGF-C, and TGF- $\beta$ 1. (A)  $\beta$ -actin (from left lane to right, **1**: no-treatment, **2**: 1  $\mu$ g/mL 4HR at 2 h, **3**: 5  $\mu$ g/mL 4HR at 2 h, **4**: 10  $\mu$ g/mL 4HR at 2 h, **5**: 1  $\mu$ g/mL 4HR at 8 h, **6**: 5  $\mu$ g/mL 4HR at 8 h, **7**: 10  $\mu$ g/mL 4HR at 8 h, **8**: 1  $\mu$ g/mL 4HR at 24 h, **9**: 5  $\mu$ g/mL 4HR at 24 h, **10**: 10  $\mu$ g/mL 4HR at 24 h). (B) VEGF-A (from left lane to right, **1**: no-treatment, **2**: 1  $\mu$ g/mL 4HR at 2 h, **3**: 5  $\mu$ g/mL 4HR at 2 h, **4**: 10  $\mu$ g/mL 4HR at 2 h, **5**: 1  $\mu$ g/mL 4HR at 8 h, **6**: 5  $\mu$ g/mL 4HR at 8 h, **7**: 10  $\mu$ g/mL 4HR at 8 h, **8**: 1  $\mu$ g/mL 4HR at 24 h, **9**: 5  $\mu$ g/mL 4HR at 24 h, **10**: 10  $\mu$ g/mL 4HR at 24 h). (C) VEGF-C (from left lane to right, **1**: no-treatment, **2**: 1  $\mu$ g/mL 4HR at 2 h, **3**: 5  $\mu$ g/mL 4HR at 2 h, **4**: 10  $\mu$ g/mL 4HR at 2 h, **5**: 1  $\mu$ g/mL 4HR at 8 h, **6**: 5  $\mu$ g/mL 4HR at 8 h, **7**: 10  $\mu$ g/mL 4HR at 8 h, **8**: 1  $\mu$ g/mL 4HR at 24 h, **9**: 5  $\mu$ g/mL 4HR at 24 h, **10**: 10  $\mu$ g/mL 4HR at 24 h). (D) TGF- $\beta$ 1 (from left lane to right, **1**: no-treatment, **2**: 1  $\mu$ g/mL 4HR at 2 h, **3**: 5  $\mu$ g/mL 4HR at 2 h, **4**: 10  $\mu$ g/mL 4HR at 2 h, **5**: 1  $\mu$ g/mL 4HR at 8 h, **6**: 5  $\mu$ g/mL 4HR at 8 h, **7**: 10  $\mu$ g/mL 4HR at 8 h, **8**: 1  $\mu$ g/mL 4HR at 24 h, **9**: 5  $\mu$ g/mL 4HR at 24 h, **10**: 10  $\mu$ g/mL 4HR at 24 h).

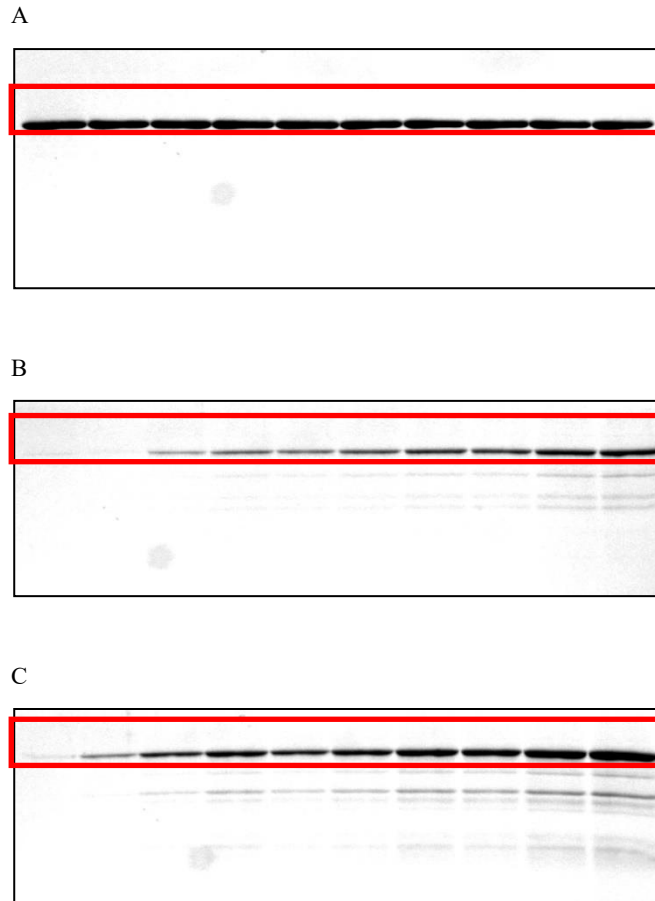

**Figure S2.** Full length blot of Figure 1B. The application of TGF- $\beta$ 1 increased the expression of VEGF-A and VEGF-C. (A)  $\beta$ -actin (from left lane to right, 1: no-treatment, 2: 1 ng/mL TGF- $\beta$ 1 at 2 h, 3: 5 ng/mL TGF- $\beta$ 1 at 2 h, 4: 10 ng/mL TGF- $\beta$ 1 at 2 h, 5: 1 ng/mL TGF- $\beta$ 1 at 8 h, 6: 5 ng/mL TGF- $\beta$ 1 at 8 h, 7: 10 ng/mL TGF- $\beta$ 1 at 8 h, 8: 1 ng/mL TGF- $\beta$ 1 at 24 h, 9: 5 ng/mL TGF- $\beta$ 1 at 24 h, 10: 10 ng/mL TGF- $\beta$ 1 at 24 h). (B) VEGF-A (from left lane to right, 1: no-treatment, 2: 1 ng/mL TGF- $\beta$ 1 at 2 h, 3: 5 ng/mL TGF- $\beta$ 1 at 2 h, 4: 10 ng/mL TGF- $\beta$ 1 at 2 h, 5: 1 ng/mL TGF- $\beta$ 1 at 8 h, 6: 5 ng/mL TGF- $\beta$ 1 at 8 h, 7: 10 ng/mL TGF- $\beta$ 1 at 8 h, 8: 1 ng/mL TGF- $\beta$ 1 at 24 h, 9: 5 ng/mL TGF- $\beta$ 1 at 24 h, 10: 10 ng/mL TGF- $\beta$ 1 at 24 h). (C) VEGF-C (from left lane to right, 1: no-treatment, 2: 1 ng/mL TGF- $\beta$ 1 at 2 h, 3: 5 ng/mL TGF- $\beta$ 1 at 2 h, 4: 10 ng/mL TGF- $\beta$ 1 at 2 h, 5: 1 ng/mL TGF- $\beta$ 1 at 8 h, 6: 5 ng/mL TGF- $\beta$ 1 at 8 h, 7: 10 ng/mL TGF- $\beta$ 1 at 8 h, 8: 1 ng/mL TGF- $\beta$ 1 at 24 h, 9: 5 ng/mL TGF- $\beta$ 1 at 24 h, 10: 10 ng/mL TGF- $\beta$ 1 at 24 h).

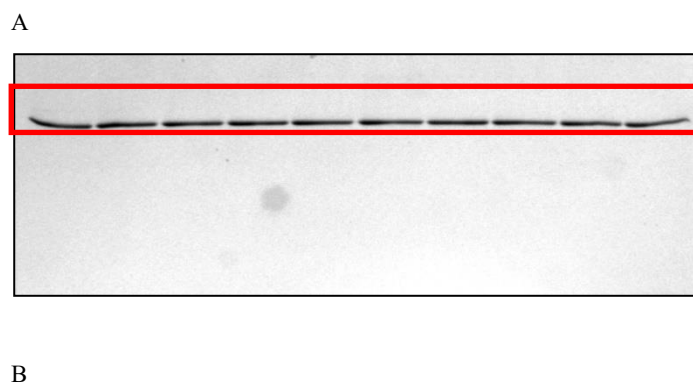

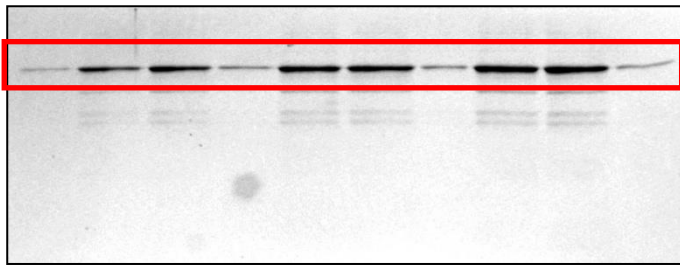

C

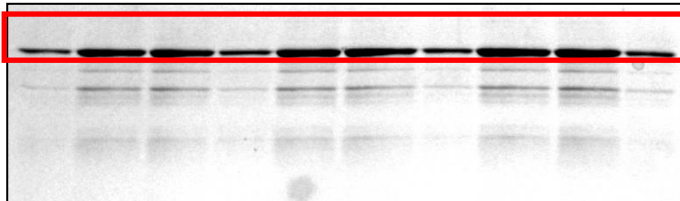

**Figure S3.** Full length blot of Figure 2A. The application of TGF- $\beta$ 1 siRNA inhibited the expression of VEGF-A, VEGF-C, which was induced by 4HR application. (A)  $\beta$ -actin (from left lane to right, 1: no-treatment, 2: 1  $\mu$ g/mL 4HR, 3: 1  $\mu$ g/mL 4HR with random RNA, 4: 1  $\mu$ g/mL 4HR with TGF- $\beta$ 1 siRNA, 5: 5  $\mu$ g/mL 4HR, 6: 5  $\mu$ g/mL 4HR with random RNA, 7: 5  $\mu$ g/mL 4HR with TGF- $\beta$ 1 siRNA, 8: 10  $\mu$ g/mL 4HR, 9: 10  $\mu$ g/mL 4HR with random RNA, 10: 10  $\mu$ g/mL 4HR with TGF- $\beta$ 1 siRNA). (B) VEGF-A (from left lane to right, 1: no-treatment, 2: 1  $\mu$ g/mL 4HR, 3: 1  $\mu$ g/mL 4HR with random RNA, 4: 1  $\mu$ g/mL 4HR with TGF- $\beta$ 1 siRNA, 5: 5  $\mu$ g/mL 4HR, 6: 5  $\mu$ g/mL 4HR with random RNA, 7: 5  $\mu$ g/mL 4HR with TGF- $\beta$ 1 siRNA, 8: 10  $\mu$ g/mL 4HR, 9: 10  $\mu$ g/mL 4HR with random RNA, 10: 10  $\mu$ g/mL 4HR with TGF- $\beta$ 1 siRNA). (C) VEGF-C (from left lane to right, 1: no-treatment, 2: 1  $\mu$ g/mL 4HR, 3: 1  $\mu$ g/mL 4HR with random RNA, 4: 1  $\mu$ g/mL 4HR with TGF- $\beta$ 1 siRNA, 5: 5  $\mu$ g/mL 4HR, 6: 5  $\mu$ g/mL 4HR with random RNA, 7: 5  $\mu$ g/mL 4HR with TGF- $\beta$ 1 siRNA, 8: 10  $\mu$ g/mL 4HR, 9: 10  $\mu$ g/mL 4HR with random RNA, 10: 10  $\mu$ g/mL 4HR with TGF- $\beta$ 1 siRNA).

A

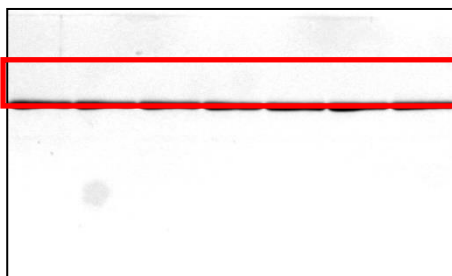

B

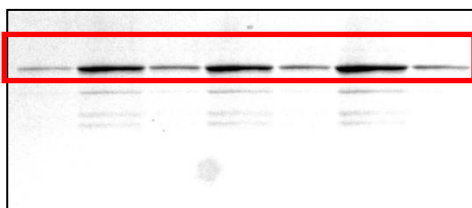

C

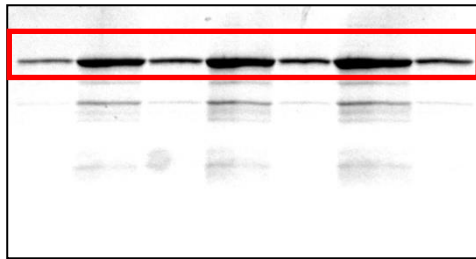

**Figure S4.** Full length blot of Figure 2B. ALK5 inhibitor (A83-01) showed a similar effect to that of TGF- $\beta$ 1 siRNA on VEGFs expression by 4HR in HUVECs. (A)  $\beta$ -actin (from left lane to right, **1**: no-treatment, **2**: 1  $\mu$ g/mL 4HR, **3**: 1  $\mu$ g/mL 4HR with 12 nM A83-01, **4**: 5  $\mu$ g/mL 4HR, **5**: 5  $\mu$ g/mL 4HR with 12 nM A83-01, **6**: 10  $\mu$ g/mL 4HR, **7**: 10  $\mu$ g/mL 4HR with 12 nM A83-01). (B) VEGF-A (from left lane to right, **1**: no-treatment, **2**: 1  $\mu$ g/mL 4HR, **3**: 1  $\mu$ g/mL 4HR with 12 nM A83-01, **4**: 5  $\mu$ g/mL 4HR, **5**: 5  $\mu$ g/mL 4HR with 12 nM A83-01, **6**: 10  $\mu$ g/mL 4HR, **7**: 10  $\mu$ g/mL 4HR with 12 nM A83-01). (C) VEGF-C (from left lane to right, **1**: no-treatment, **2**: 1  $\mu$ g/mL 4HR, **3**: 1  $\mu$ g/mL 4HR with 12 nM A83-01, **4**: 5  $\mu$ g/mL 4HR, **5**: 5  $\mu$ g/mL 4HR with 12 nM A83-01, **6**: 10  $\mu$ g/mL 4HR, **7**: 10  $\mu$ g/mL 4HR with 12 nM A83-01).

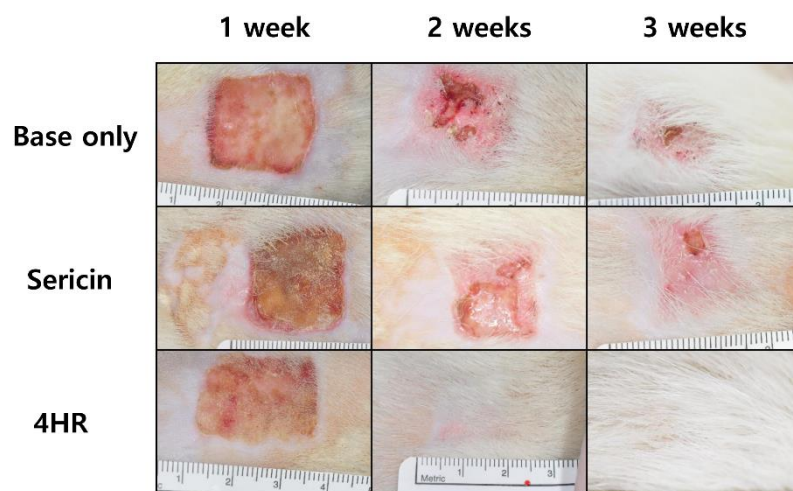

**Figure 5.** The images for burn wound at different time point.

A

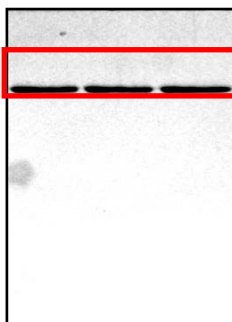

B

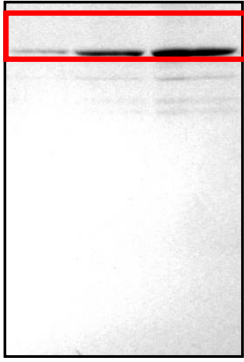

C

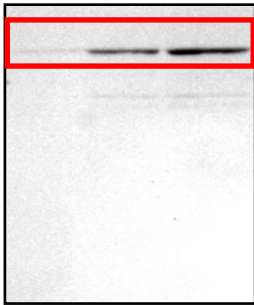

D

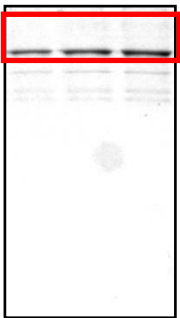

E

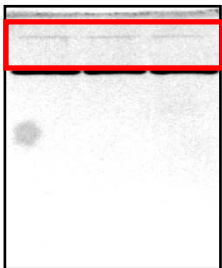

F

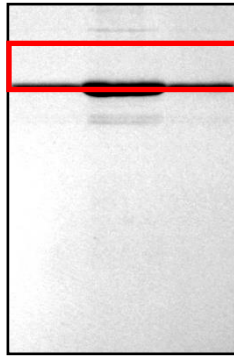

G

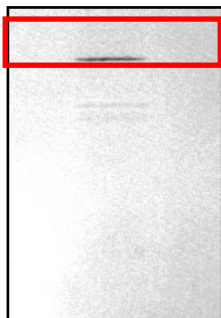

H

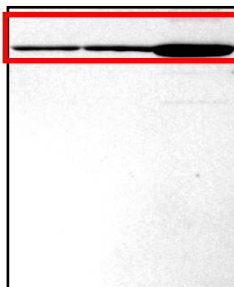

**Figure S6.** Full length blot of Figure 5. (A)  $\beta$ -actin (from left lane to right, 1: ointment base only, 2: sericin ointment, 3: 4HR ointment). (B) TGF- $\beta$ 1 (from left lane to right, 1: ointment base only, 2: sericin ointment, 3: 4HR ointment). (C) VEGF-A (from left lane to right, 1: ointment base only, 2: sericin ointment, 3: 4HR ointment). (D) VEGF-C (from left lane to right, 1: ointment base only, 2: sericin ointment, 3: 4HR ointment).

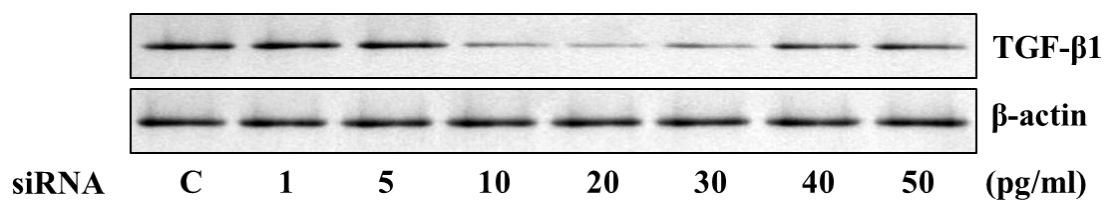

**Figure S7.** Determination of optimal concentration of TGF- $\beta$ 1 siRNA. The optimal concentration of TGF- $\beta$ 1 siRNA was determined as 20 pg/mL.

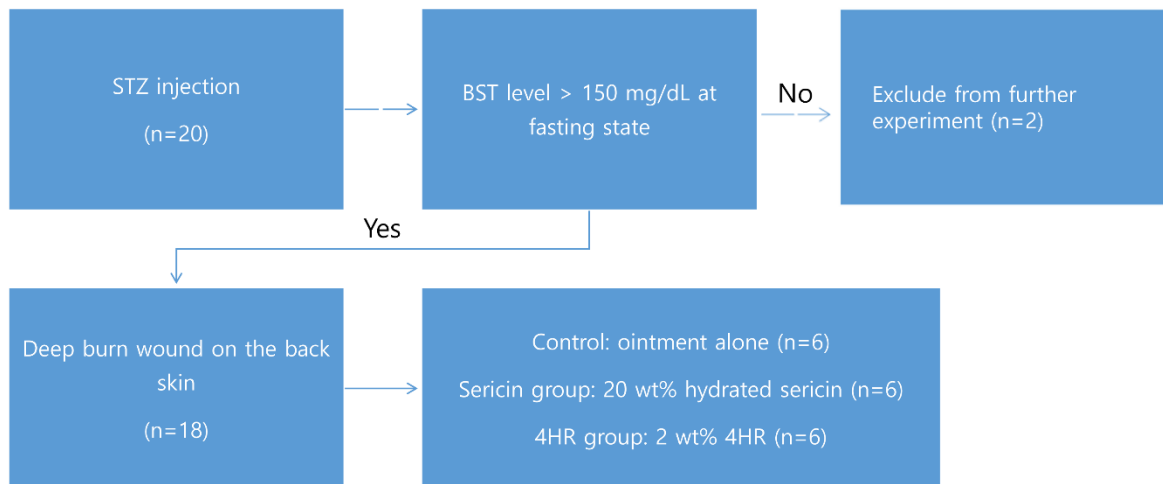

**Figure S8.** CORT chart for the animal experiment.
